# Supplementary material
Source: PubMed Central journal article supplement (PMC2756414)
Supplement: NIHMS135322-supplement-S1_Table.pdf [file NIHMS135322-supplement-S1_Table.pdf]

Supplementary information S1 | **ASD related syndromes<sup>†</sup>**

| Syndrome ( <i>Gene</i> )<br>OMIM Link <sup>^</sup>                                                                                                                                                                        | Proportion<br>Syndrome<br>with ASD      | Proportion<br>ASD with<br>Syndrome | Estimated<br>Frequency         | Intellectual<br>Impairment | M / F <sup>^</sup> | Dysmorph.                 | Seizures       | Speech<br>Impaired                            | Motor                                      | Other                                                                                                             |
|---------------------------------------------------------------------------------------------------------------------------------------------------------------------------------------------------------------------------|-----------------------------------------|------------------------------------|--------------------------------|----------------------------|--------------------|---------------------------|----------------|-----------------------------------------------|--------------------------------------------|-------------------------------------------------------------------------------------------------------------------|
| 15q Duplication<br>Syndrome <sup>1</sup>                                                                                                                                                                                  | High                                    | ~1%                                | <1/10,00                       | Yes                        | =                  | Yes (variable<br>& minor) | Yes            | Yes                                           | Hypotonia<br><br>Delayed                   | Reports of Sudden Death                                                                                           |
| 16p11 Deletion<br>Syndrome <sup>2-4</sup>                                                                                                                                                                                 | High                                    | ~1%                                | 1/4,000                        | Yes                        | =                  | No                        | No             | Yes                                           | Hypotonia<br><br>Delayed                   | Congenital Cardiovascular<br>Abnormalities                                                                        |
| 22q11-13 Del<br>( <i>SHANK3</i> ) <sup>5-7</sup> <a href="http://www.ncbi.nlm.nih.gov/entrez/dispomim.cgi?id=606232">http://<br/>www.ncbi.nlm.nih.<br/>gov/entrez/dispomim.<br/>cgi?id=606232</a>                         | High                                    | ~1%                                | Unknown                        | Yes                        | <1                 | Yes (mild)                | Yes (Variable) | Yes (Absent<br>or severely<br>delayed)        | Hypotonia                                  | Normal or accelerated<br>growth                                                                                   |
| Angelman Syndrome<br>(mat. 15q11) <sup>8,9</sup> <a href="http://www.ncbi.nlm.nih.gov/entrez/dispomim.cgi?id=105830">http://<br/>www.ncbi.nlm.nih.<br/>gov/entrez/dispomim.<br/>cgi?id=105830</a>                         | 40%                                     | <1%                                | 1/10,000                       | Yes (severe)               | =                  | Yes                       | Yes            | Mutism                                        | Ataxia<br><br>Limb Tremor<br><br>Hypotonia | Microcephaly<br><br>Hypopigmentation<br><br>Paroxysmal Laughter<br><br>Feeding problems<br><br>Scoliosis          |
| Cortical Dysplasia<br>Focal Epilepsy<br>( <i>CNTNAP2</i> ) <sup>10</sup> <a href="http://www.ncbi.nlm.nih.gov/entrez/dispomim.cgi?id=610042">http://<br/>www.ncbi.nlm.nih.<br/>gov/entrez/dispomim.<br/>cgi?id=610042</a> | 67%                                     | Rare                               | Rare<br><br>(Amish<br>Isolate) | Yes                        | =                  | No                        | Yes            | Yes (Regression<br>subsequent to<br>seizures) | Delayed<br>Develop.                        | Cortical Dysplasia<br><br>Neuronal Migration<br>Abnormalities<br><br>Diminished or absent<br>deep-tendon reflexes |
| Fragile X ( <i>FMR1</i> ) <sup>11</sup><br><a href="http://www.ncbi.nlm.nih.gov/entrez/dispomim.cgi?id=300624">http://www.ncbi.<br/>nlm.nih.gov/<br/>entrez/dispomim.<br/>cgi?id=300624</a>                               | 25% of<br>Males<br><br>6% of<br>Females | 1-2%                               | 1/4,000<br>Males               | Yes                        | >1                 | Yes                       | No             | Yes                                           | Delayed<br>Develop.                        | Macrocephaly<br><br>Congenital Cardiovascular<br>Abnormalities<br><br>Macroorchidism<br><br>Scoliosis             |

|                                                                                                                                                                                 |        |         |                  |              |    |     |            |                           |                                                                             |                                                                                                                                                        |
|---------------------------------------------------------------------------------------------------------------------------------------------------------------------------------|--------|---------|------------------|--------------|----|-----|------------|---------------------------|-----------------------------------------------------------------------------|--------------------------------------------------------------------------------------------------------------------------------------------------------|
| Joubert Syndrome (several loci) <sup>12</sup> <a href="http://www.ncbi.nlm.nih.gov/entrez/dispomim.cgi?id=213300">http://www.ncbi.nlm.nih.gov/entrez/dispomim.cgi?id=213300</a> | 25%    | Rare    | Rare             | Yes          | =  | Yes | No         | Yes                       | Ataxia, Delayed Develop.                                                    | Brainstem/Cerebellar Hypoplasia<br>Macrocephaly<br>Coloboma                                                                                            |
| Potocki–Lupski (17p11) <sup>13</sup> <a href="http://www.ncbi.nlm.nih.gov/entrez/dispomim.cgi?id=610883">http://www.ncbi.nlm.nih.gov/entrez/dispomim.cgi?id=610883</a>          | ~90%   | Unknown | Rare             | Yes (mild)   | =  | Yes | Abnorm EEG | Yes                       | Hypotonia                                                                   | Congenital Cardiovascular Abnormalities<br>Scoliosis<br>Hypercholesterolemia                                                                           |
| Smith Lemli Optiz (DHCR7) <sup>14</sup> <a href="http://www.ncbi.nlm.nih.gov/entrez/dispomim.cgi?id=270400">http://www.ncbi.nlm.nih.gov/entrez/dispomim.cgi?id=270400</a>       | 50%    | Rare    | 1/20,000         | Yes          | =  | Yes | Yes        | Yes                       | Hypotonia (infancy)<br>Opisthokinesis                                       | Frontal Hypoplasia<br>Aberrant Neuronal Migration<br>Microcephaly<br>Congenital Cardiovascular Abnormalities<br>Cryptorchidism<br>Hypercholesterolemia |
| Rett Syndrome (MECP2) <sup>15</sup> <a href="http://www.ncbi.nlm.nih.gov/entrez/dispomim.cgi?id=312750">http://www.ncbi.nlm.nih.gov/entrez/dispomim.cgi?id=312750</a>           | N/A    | ~0.5%   | 1/10,000 Females | Yes (severe) | <1 | No  | Yes        | Yes (increases over time) | Ataxia<br>Spasticity<br>Apraxia<br>Dystonia<br>Characteristic Hand Wringing | Cortical atrophy<br>Microcephaly<br>Prolonged QT (Cardiovascular)<br>Scoliosis                                                                         |
| Timothy Syndrome (ACNA1C) <sup>16</sup> <a href="http://www.ncbi.nlm.nih.gov/entrez/dispomim.cgi?id=601005">http://www.ncbi.nlm.nih.gov/entrez/dispomim.cgi?id=601005</a>       | 60–80% | Unknown | Rare             | Yes          | =  | Yes | Yes (~20%) | Yes                       | Yes                                                                         | Long QT Interval (Cardiovascular)<br>Lethal Arrhythmia<br>Other Congenital Cardiovascular Abnormalities<br>Syndactyly                                  |

|                                                                                                                                                                                   |     |     |         |     |   |    |     |          |    |                                                                                                           |
|-----------------------------------------------------------------------------------------------------------------------------------------------------------------------------------|-----|-----|---------|-----|---|----|-----|----------|----|-----------------------------------------------------------------------------------------------------------|
| Tuberous Sclerosis<br>(TSC /TSC2) <sup>17</sup> <a href="http://www.ncbi.nlm.nih.gov/entrez/dispomim.cgi?id=191100">http://www.ncbi.nlm.nih.gov/entrez/dispomim.cgi?id=191100</a> | 20% | ~1% | 1/6,000 | Yes | = | No | Yes | Variable | No | Hamartomas & Cortical Tubers in Brain<br><br>Cafe-au-lait spots<br><br>Cardiac rhythm disturbances (~35%) |
|-----------------------------------------------------------------------------------------------------------------------------------------------------------------------------------|-----|-----|---------|-----|---|----|-----|----------|----|-----------------------------------------------------------------------------------------------------------|

† Available data suggests that the syndromes listed above individually account for no more than 1–2% of ASD cases. This is compared to unclassified cytogenetic lesions visible by G-banding (~ 6–7% of cases) and unclassified *de novo* CNV visible by molecular techniques (~ 2–10% of cases). Taken together it is likely that known syndromes, observable cytogenetics lesions, and rare *de novo* mutations account for between 10–20% of cases. Rates depend on the population evaluated (e.g. higher in individuals from simplex vs. multiplex families, and dysmorphic/mental retardation vs. “idiopathic” populations). It should also be noted that none of the studies cited here indicate that assessment for ASD was performed blind to a patient’s primary diagnosis.

^ For M / F, ‘=’ denotes syndromes in which ratio of affected males to females is equal to 1. ‘>1’ and ‘<1’ correspond to disorders with a male and female bias respectively. Subtle sex biases may become evidence in these disorders as larger cohorts are studied.

References:

1. Cook, E. H., Jr. *et al.* Autism or atypical autism in maternally but not paternally derived proximal 15q duplication. *Am J Hum Genet.* **60**, 928-934 (1997).
2. Weiss, L. A. *et al.* Association between Microdeletion and Microduplication at 16p11.2 and Autism. *N Engl J Med.* (2008).
3. Kumar, R. A. *et al.* Recurrent 16p11.2 microdeletions in autism. *Hum Mol Genet.* (2007).
4. Marshall, C. R. *et al.* Structural variation of chromosomes in autism spectrum disorder. *Am J Hum Genet.* **82**, 477-488 (2008).
5. Manning, M. A. *et al.* Terminal 22q deletion syndrome: a newly recognized cause of speech and language disability in the autism spectrum. *Pediatrics.* **114**, 451-457 (2004).
6. Durand, C. M. *et al.* Mutations in the gene encoding the synaptic scaffolding protein SHANK3 are associated with autism spectrum disorders. *Nat Genet.* **39**, 25-27 (2007).
7. Moessner, R. *et al.* Contribution of SHANK3 mutations to autism spectrum disorder. *Am J Hum Genet.* **81**, 1289-1297 (2007).
8. Matsuura, T. *et al.* De novo truncating mutations in E6-AP ubiquitin-protein ligase gene (UBE3A) in Angelman syndrome. *Nat Genet.* **15**, 74-77. (1997).
9. Peters, S. U., Beaudet, A. L., Madduri, N. & Bacino, C. A. Autism in Angelman syndrome: implications for autism research. *Clin Genet.* **66**, 530-536 (2004).
10. Strauss, K. A. *et al.* Recessive symptomatic focal epilepsy and mutant contactin-associated protein-like 2. *N Engl J Med.* **354**, 1370-1377 (2006).
11. Hatton, D. D. *et al.* Autistic behavior in children with fragile X syndrome: prevalence, stability, and the impact of FMRP. *Am J Med Genet A.* **140**, 1804-1813 (2006).
12. Ozonoff, S., Williams, B. J., Gale, S. & Miller, J. N. Autism and autistic behavior in Joubert syndrome. *J Child Neurol.* **14**, 636-641 (1999).
13. Potocki, L. *et al.* Characterization of Potocki-Lupski syndrome (dup(17)(p11.2p11.2)) and delineation of a dosage-sensitive critical interval that can convey an autism phenotype. *Am J Hum Genet.* **80**, 633-649 (2007).
14. Tierney, E. *et al.* Behavior phenotype in the RSH/Smith-Lemli-Opitz syndrome. *Am J Med Genet.* **98**, 191-200 (2001).
15. Amir, R. E. *et al.* Rett syndrome is caused by mutations in X-linked MECP2, encoding methyl-CpG-binding protein 2. *Nat Genet.* **23**, 185-188 (1999).
16. Splawski, I. *et al.* Ca(V)1.2 calcium channel dysfunction causes a multisystem disorder including arrhythmia and autism. *Cell.* **119**, 19-31 (2004).
17. Baker, P., Piven, J. & Sato, Y. Autism and tuberous sclerosis complex: prevalence and clinical features. *J Autism Dev Disord.* **28**, 279-285 (1998).
